# Supplementary material for: A dendrite-free Zn anode enabled by PEDOT:PSS/MoS2 electrokinetic channels for aqueous Zn-ion batteries
Source: Royal Society of Chemistry journal article supplement (doi:10.1039/d4nr00465e), 2024-01-01
Supplement: d4nr00465e1.pdf [file d4nr00465e1.pdf]

## Electronic Supplementary Material

### **Dendrite-Free Zn Anode Enabled by PEDOT:PSS/MoS<sub>2</sub> Electrokinetical Channels for Aqueous Zn-ion Batteries**

Hai Wang <sup>a</sup>, Qin Zhao <sup>b</sup>, Weimin Li <sup>b\*</sup>, Shun Watanabe <sup>a\*</sup>, and Xiaobo Wang <sup>b\*</sup>

<sup>a</sup>: Department of Advanced Materials Science, Graduate School of Frontier Sciences,  
The University of Tokyo, 5-1-5 Kashiwanoha, Kashiwa, Chiba, 277-8561, Japan.

<sup>b</sup>: State Key Laboratory of Solid Lubrication, Lanzhou Institute of Chemical Physics,  
Chinese Academy of Sciences, Lanzhou730000, People's Republic of China.

Corresponding author e-mail address: [liwm@licp.cas.cn](mailto:liwm@licp.cas.cn), [\[tokyo.ac.jp\]\(mailto:tokyo.ac.jp\), \[wangxb@licp.cas.cn\]\(mailto:wangxb@licp.cas.cn\)](mailto:swatanabe@edu.k.u-</a></p></div><div data-bbox=)

## **Materials and methods**

**Materials.** Monolayer Molybdenum disulfide ( $\text{MoS}_2$ ), and N-methyl pyrrolidone (NMP, AR) were purchased from Aladdin Reagent (China) Co., Ltd. Ethanol was purchased from Sinopharm Chemical Reagent Co. and Polyvinylidene fluoride (PVDF, AR) was purchased from Sigma-Aldrich. PEDOT:PSS dispersion liquid (2%) was purchased from Shanghai Ouyi Organic Photoelectric Materials Co., LTD. Carbon black (Super P) was purchased from Alfa Aesar. Zinc sulfate heptahydrate ( $\text{ZnSO}_4 \cdot 7\text{H}_2\text{O}$ , AR) was bought from Sinopharm Chemical Reagent Co., Ltd., China. Zinc foil was purchased from Shenzhen AES Automation Technology Co., Ltd. Deionized water was prepared by laboratory ultrapure water machine. All the chemicals were used as received without further purification.

**Assembly of PEPM.** 0.5g monolayer  $\text{MoS}_2$  and 5 g PEDOT:PSS were mixed in 80 mL water and the  $\text{MoS}_2$  powder was dispersed in deionized water. The suspension is then treated ultrasonically with a low-power (100 W) water bath for 40 minutes. The obtained suspension was centrifuged at 1500 rpm for 10 minutes to remove the thick  $\text{MoS}_2$  sheets, and finally the supernatant was collected by vacuum filtration and dried in a freeze dryer. The functionalized composite is labeled as PEDOT:PSS/ $\text{MoS}_2$  (PEPM).

**Preparation of PEPM@Zn Anodes.** The Zn foil was cleaned with ethanol and dried in a vacuum oven of 40 °C for further use. PEPM and PVDF binder, with a weight ratio of 9:1, were homogeneously mixed in NMP under continuous ultrasonic stirring, and then uniformly coated on the surface of Zn foil using a brush. The process parameters

were optimized to achieve expected thickness and best homogeneity for an ideal interfacial performance. The PEPM@Zn electrode was cut into  $\phi$  14 mm round pieces after dried at 40 °C in the oven.

### **Preparation of V<sub>2</sub>O<sub>5</sub> Cathodes.**

The V<sub>2</sub>O<sub>5</sub> cathodes were prepared in NMP solution by combining the activated materials, carbon black and PVDF with a mass ratio of 70:20:10. The slurry is then spread on the carbon fibers with a thickness of about 50  $\mu$ m using the blade technique. After drying at 100 °C for 6 h, the electrodes was then calendered, cut into discs with a diameter of 12 mm and placed in a glove box. The active substance load is about 1.5~2 mg cm<sup>-2</sup>.

### **Full Cell Assembly**

The Zn//V<sub>2</sub>O<sub>5</sub> full battery is assembled in a glove box filled with argon gas with V<sub>2</sub>O<sub>5</sub> cathode, PEPM@Zn (or bare Zn) foil as the anode and 2 M ZnSO<sub>4</sub> as electrolyte. Glass fiber (Whatman GF/D) is embedded in the CR2032 coin-type battery. The assembled full cells were left standing for at least 10 h to ensure a proper wetting of the cell components before performing electrochemical tests.

### **Materials characterization**

The structure and morphology of electrodes were characterized by scanning electron microscopy (SEM, JSM 7610 plus). The micro-structures of the electrode materials were characterized using transmission electron microscopy (TEM, JEOL JEM-2100FEG). The elemental content was obtained using X-ray Photoelectron

Spectroscopy (XPS, Thermo Scientific ESCALAB Xi+), X-ray Diffraction (XRD, Rigaku Ultima IV) and EDS (HORIBA EMAX).

### **Electrochemical characterization**

Electrochemical measurements were conducted using CR2032-type coin cells at room temperature. For the Coulombic efficiency (CE) test, bare Zn and PEPM@Zn were punched into 12-mm diameter discs as the working electrodes, Ti foil was used as the counter electrode, and the glass fiber separator as the separator. The 2 M ZnSO<sub>4</sub> aqueous solution was used as the electrolyte. The current density is controlled at 1 mA cm<sup>-2</sup> as well as the surface capacity is 1 mAh cm<sup>-2</sup> to measure the Coulombic efficiency. Electrochemical impedance spectroscopy (EIS) was performed over the frequency range of 10 mHz to 100 kHz. Cyclic voltammetry (CV) data, Tafel plot, Chronoamperometry (CA) curves and EIS test were collected by using Shanghai Chenhua CHI660E electrochemical workstation. Galvanostatic charge-discharge and cyclic tests were carried out by using CT20001A cell test instrument (LAND Electronic Co.).

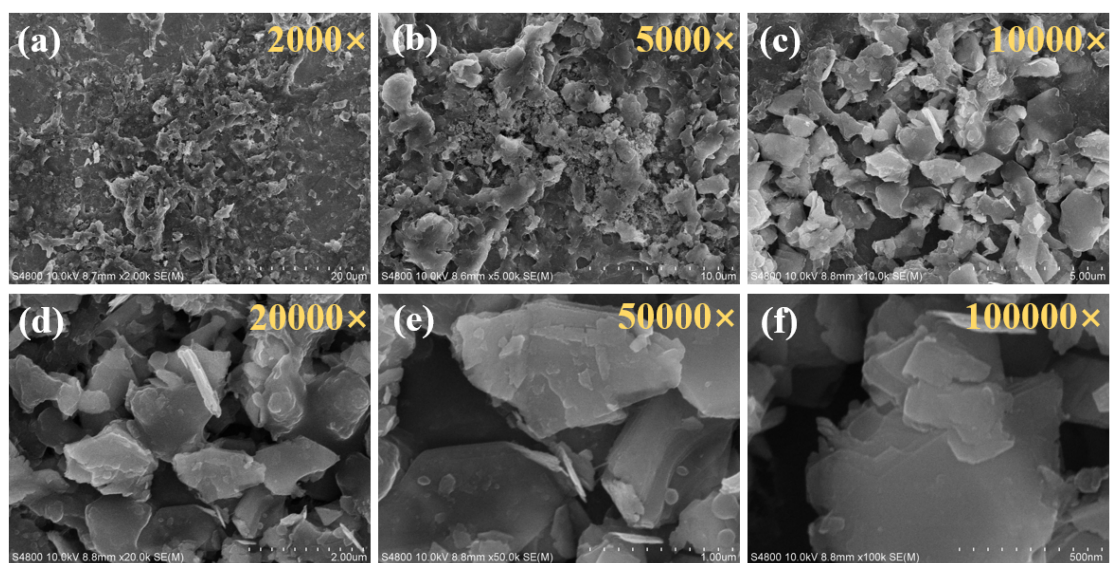

Figure S1 SEM images of PEPM@Zn anodes under different magnifications

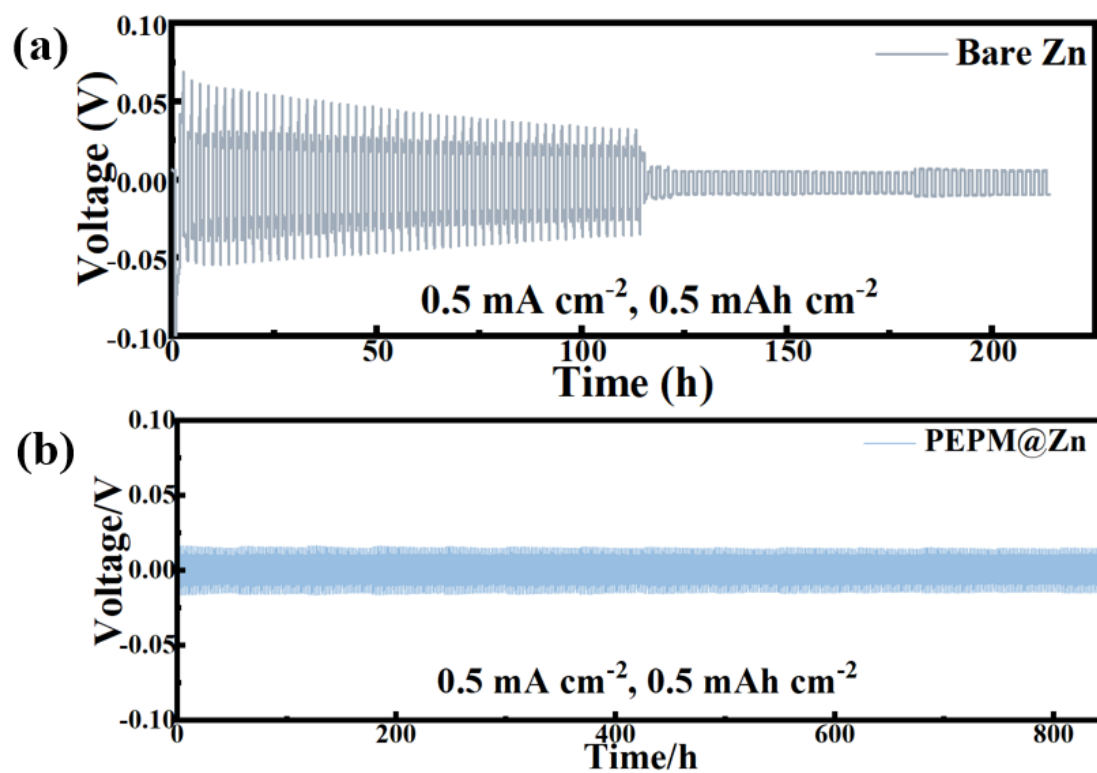

Figure S2 Galvanostatic performance of (a) bare Zn and (b) PEPM@Zn symmetric cells at the current density of  $0.5 \text{ mA cm}^{-2}$  and  $0.5 \text{ mAh cm}^{-2}$

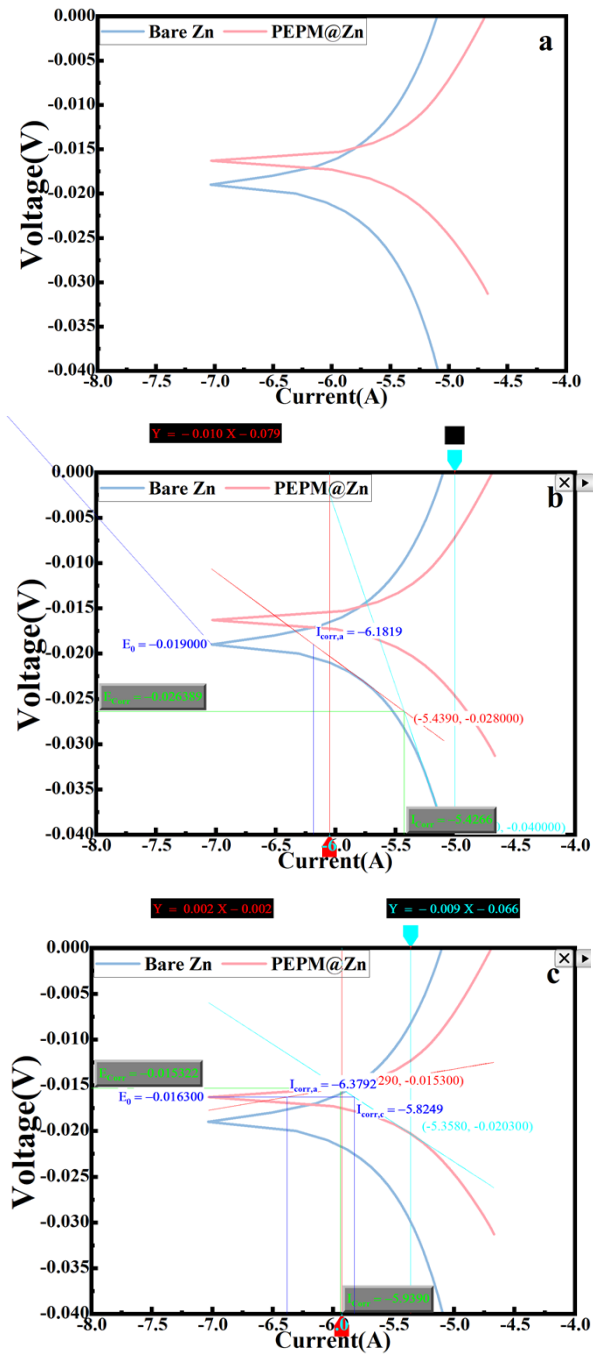

Figure S3 (a) Tafel polarization curves of symmetric cells in the same three-electrode cell, (b) fitted Tafel polarization curve of bare Zn anode, (c) fitted Tafel polarization curve of PEPM@Zn

anode

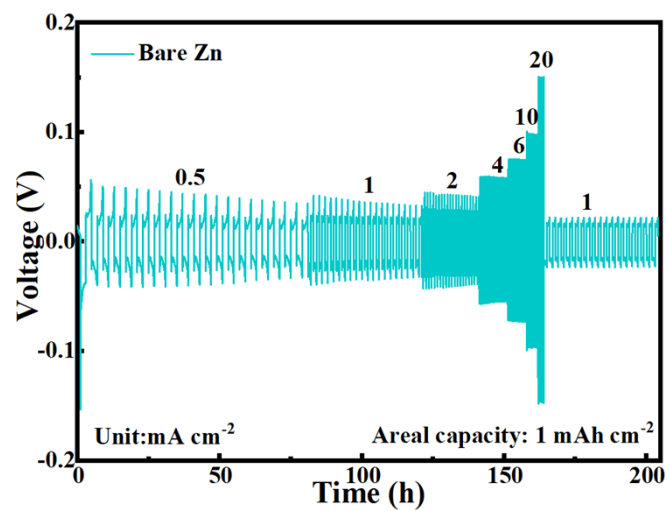

Figure S4 Rate performance of bare Zn anode



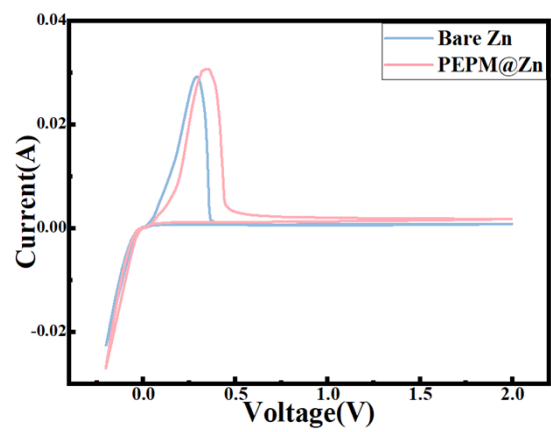

Figure S5 Cyclic voltammetry curves of symmetric cells of Bare Zn and PEPM@Zn

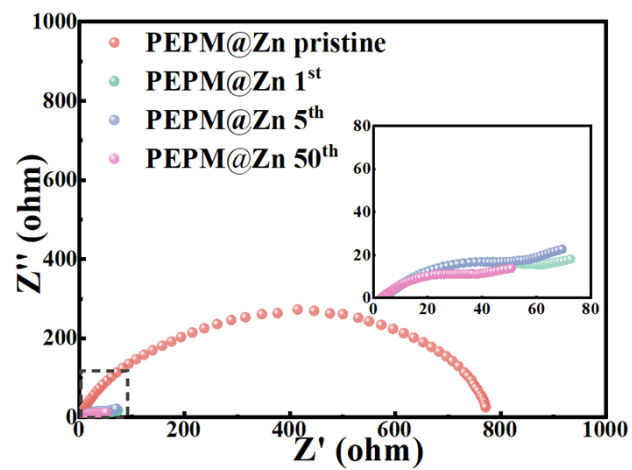

Figure S6 Nyquist plot of symmetric cell based on PEPM@Zn anode

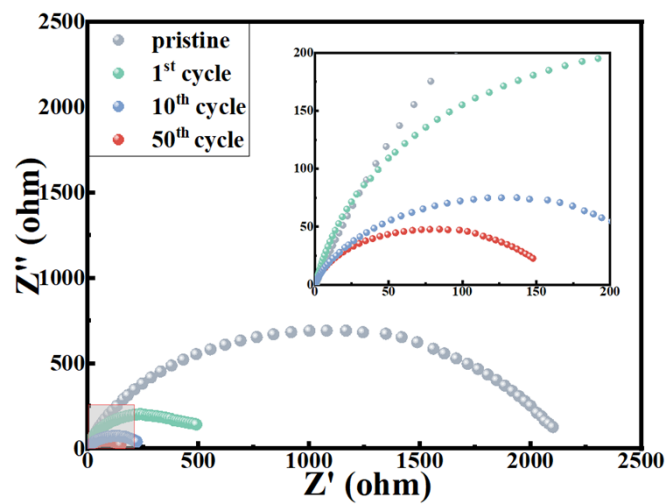

Figure S7 Nyquist plot of symmetric cell based on bare Zn anode

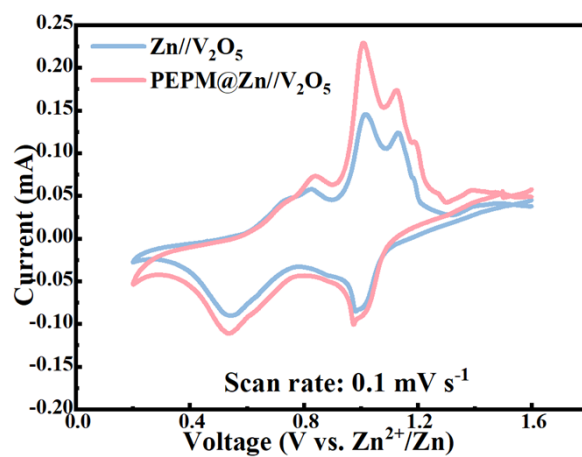

Figure S8 Comparison of CV curves of PEPM@Zn//V<sub>2</sub>O<sub>5</sub> and Zn//V<sub>2</sub>O<sub>5</sub> full cells

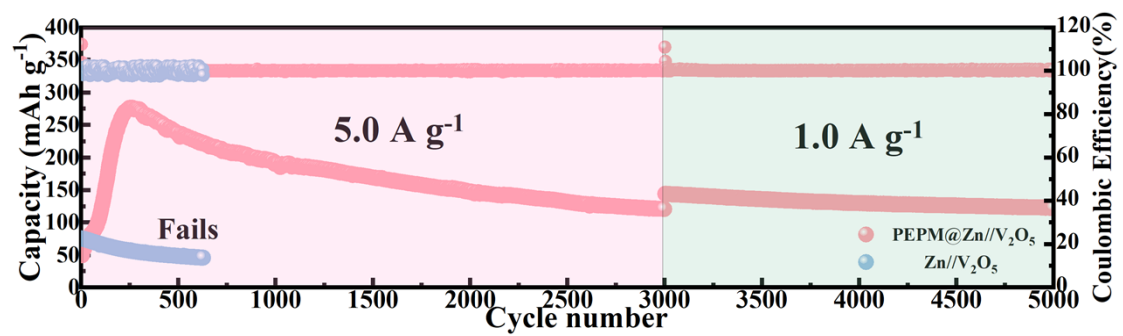

Figure S9 Long-term stability and performance of PEPM@Zn anode and bare Zn anode under various current densities

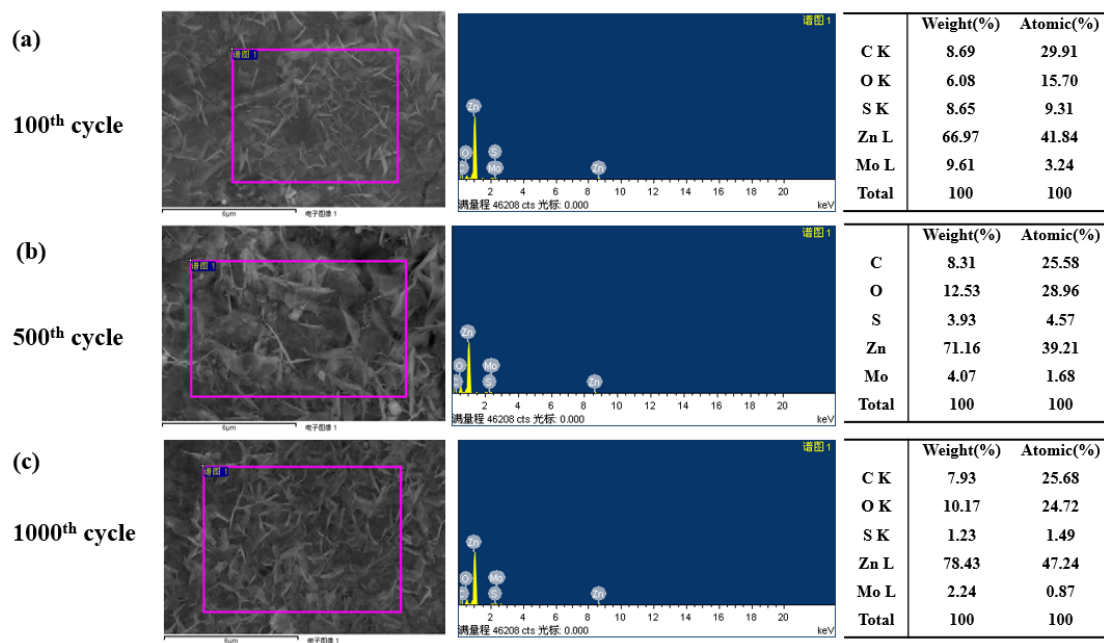

Figure S10 (a),(b) and (c) Ex-situ SEM images and EDS mapping of PEPM@Zn anode at different cycle stages

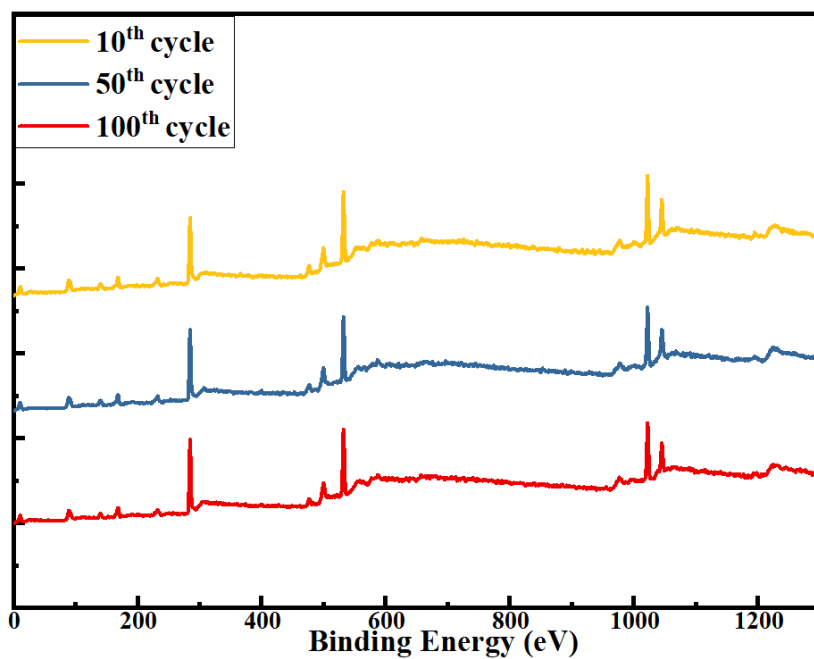

Figure S11 Overall XPS spectra of PEPM@Zn anode at different cycle stages

Table S1. Comparison of cycling performance for this work with reported devices

| Anode               | Electrolyte                                    | Working condition<br>(mA cm <sup>-2</sup> -mAh cm <sup>-2</sup> ) | Lifespan(h) | Reference |
|---------------------|------------------------------------------------|-------------------------------------------------------------------|-------------|-----------|
| GiZn                | 2 M ZnSO <sub>4</sub>                          | 10-2                                                              | 383         | [33]      |
| Zn@ZnO              | 1 M Zn(OTf) <sub>2</sub>                       | 5-2.5                                                             | 100         | [34]      |
| ZnS@Zn              | 1 M ZnSO <sub>4</sub>                          | 2-2                                                               | 1100        | [35]      |
| MZn-60              | 2 M ZnSO <sub>4</sub>                          | 0.2-0.2                                                           | 820         | [36]      |
| Zn@Sb               | 2 M ZnSO <sub>4</sub> +0.1 M MnSO <sub>4</sub> | 3-1                                                               | 1000        | [37]      |
| MMT-Zn              | 2 M ZnSO <sub>4</sub>                          | 1-0.25                                                            | 1000        | [38]      |
| PEDOT:PSS/G<br>S@Zn | 2 M ZnSO <sub>4</sub>                          | 0.1-5                                                             | 500         | [39]      |
| PVB@Zn              | 1 M ZnSO <sub>4</sub>                          | 0.5-0.5                                                           | 2200        | [40]      |
| PTC@Zn              | 2 M ZnSO <sub>4</sub>                          | 10-5                                                              | 550         | [41]      |
| ILG-Zn              | 2 M ZnSO <sub>4</sub>                          | 0.1-0.1                                                           | 1000        | [42]      |
| MIL-125(Ti)-<br>Zn  | 2 M ZnSO <sub>4</sub>                          | 5-5                                                               | 700         | [43]      |
| Zn/CNT              | 2 M ZnSO <sub>4</sub>                          | 5-2.5                                                             | 110         | [44]      |
| GFA-Zn              | 2 M ZnSO <sub>4</sub>                          | 3-3                                                               | 700         | [45]      |
| PEPM@Zn             | 2 M ZnSO <sub>4</sub>                          | 5-5                                                               | 390         | This work |



**Theoretical calculations:** The density function theory (DFT) calculations were implemented by using Vienna *ab-initio* simulation package (VASP).<sup>1,2</sup> The Perdew-Burke-Ernzerhof (PBE) with generalized gradient approximation (GGA) was employed for the exchange-correlation functional.<sup>3</sup> A plane wave basis with the cutoff energy of 400 eV was chosen in this work. A  $1 \times 1 \times 1$  k-point mesh was used in these calculations.<sup>4-6</sup> We consider the van der Waals (vdW) interaction using the DFT-D3 method. A vacuum layer along the out-plane direction of 15 Å was constructed to restrain the interactions between adjacent slabs. The residual force and energy convergence thresholds were set to 0.02 eV Å<sup>-1</sup> and 10<sup>-5</sup> eV Å<sup>-1</sup>, respectively. The MoS<sub>2</sub> model is a 3×5×1 supercell which includes 30 Mo atoms and 60 S atoms.

The charge density difference is calculated by the following equation:

$$\Delta\rho = \rho_{\text{total}} - \rho_{\text{base}} - \rho_{\text{Zn}}$$

Where  $\rho_{\text{total}}$  represents the optimized structural charge density of the interface,  $\rho_{\text{base}}$  represents the charge density of the base that forms the interface (PEDOT:PSS/MoS<sub>2</sub> or MoS<sub>2</sub>), and  $\rho_{\text{Zn}}$  represents the charge density of Zn.

The adsorption energy for Zn atom is defined as:

$$E_{\text{ad}} = E_{\text{total}} - E_{\text{base}} - E_{\text{Zn}}$$

where  $E_{\text{total}}$ ,  $E_{\text{base}}$ , and  $E_{\text{Zn}}$  represent the total energy of Zn adsorption on different surfaces, the energy of PEDOT:PSS/MoS<sub>2</sub> layer, and the energy of atomic Zn, respectively.

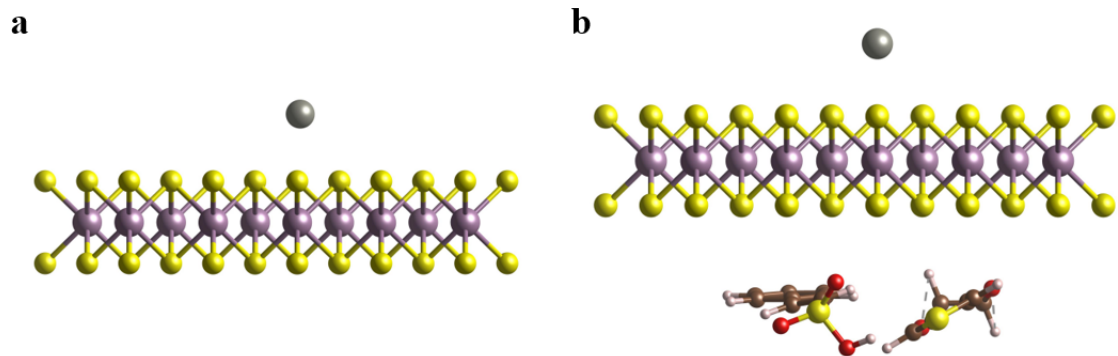

Figure S12 Interface model of (a) Zn-MoS<sub>2</sub> and (b) Zn-MgF<sub>2</sub>/MoS<sub>2</sub>, the gray, yellow, purple, brown, red and light brown balls represent Zn, S, Mo, C, O and H atoms respectively, the gray, yellow, red, brown, and light pink balls represent Zn, S, O, C, B, N and H atoms respectively.

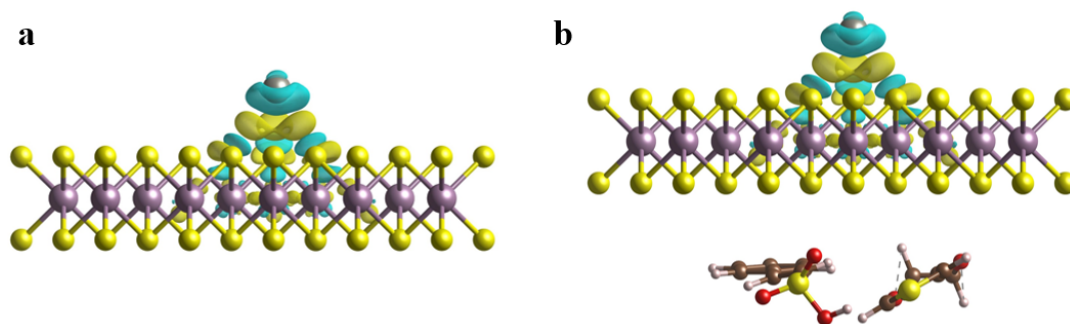

Figure S13 Comparison of charge density differences in (a) Zn-MoS<sub>2</sub> structure and (b) Zn-PEDOT:PSS/MoS<sub>2</sub> core-shell structure

## Reference

- [1] Yi, Z.; Chen, G.; Hou, F.; Wang, L.; Liang, J. Strategies for the Stabilization of Zn Metal Anodes for Zn-Ion Batteries. *Adv. Energy Mater.* **2021**, *11*, 2003065.
- [2] Hao, J.; Li, B.; Li, X.; Zeng, X.; Zhang, S.; Yang, F.; Liu, S.; Li, D.; Wu, C.; Guo, Z. An In-Depth Study of Zn Metal Surface Chemistry for Advanced Aqueous Zn-Ion Batteries. *Adv. Mater.* **2020**, *32*, 2003021.
- [3] Cao, Y.; Tang, X.; Li, L.; Tu, H.; Hu, Y.; Yu, Y.; Cheng, S.; Lin, H.; Zhang, L.; Di, J. Fast Zn<sup>2+</sup> Mobility Enabled by Sucrose Modified Zn<sup>2+</sup> Solvation Structure for Dendrite-Free Aqueous Zinc Battery. *Nano Res.* **2023**, *16*, 3839.
- [4] Li, H.; Liu, Z.; Liang, G.; Huang, Y.; Huang, Y.; Zhu, M.; Pei, Z.; Xue, Q.; Tang, Z.; Wang, Y.; Li, B.; Zhi, C. Waterproof and Tailorable Elastic Rechargeable Yarn Zinc Ion Batteries by a Cross-Linked Polyacrylamide Electrolyte. *ACS Nano* **2018**, *12*, 3140–3148.
- [5] Wang, L.; Cao, X.; Xu, L.; Chen, J.; Zheng, J. Transformed Akhtenskite MnO<sub>2</sub> from Mn<sub>3</sub>O<sub>4</sub> as Cathode for a Rechargeable Aqueous Zinc Ion Battery. *ACS Sustainable Chem. Eng.* **2018**, *6*, 16055–16063.
- [6] Bhunia, A.; Boldog, I.; Möller, A.; Janiak, C. Highly Stable Nanoporous Covalent Triazine-Based Frameworks with an Adamantane Core for Carbon Dioxide Sorption and Separation. *J. Mater. Chem. A* **2013**, *1*, 14990–14999.
